# Supplementary material for: Highly Purified Eicosapentaenoic Acid Increases Interleukin-10 Levels of Peripheral Blood Monocytes in Obese Patients With Dyslipidemia
Source: Oxford University Press journal article supplement (doi:10.2337/dc12-0269), 2012-08-22
Supplement: dc120269supplementarydata.pdf [file dc120269supplementarydata.pdf]

## The primers in real-time quantitative PCR using human monocytes

The primers used were as follows: TNF $\alpha$  (forward primer: 5'-AAG AGT TCC CCA GGG ACC TCT-3', reverse primer: 5'-CCT GGG AGT AGA TGA GGT ACA-3'), IL-6 (forward primer: 5'-GGA CGG CTT TTA CTT AAA CGC CAA GG-3', reverse primer: 5'-ATC TTC CCT AGT TAC CCA GGT TCA GC-3'), IL-10 (forward primer: 5'-AAC AAG AGC AAG GCC GTG G-3', reverse primer: 5'-GAA GAT GTC AAA CTC ACT CAT GGC-3') (1, 2).

## Cell culture

The preparation and characterization of eicosapentaenoic acid (EPA) used *in vitro* were as reported elsewhere (3, 4). Fetal bovine serum (FBS) and penicillin-streptomycin (P/S) were obtained from GIBCO (Great Island, NY, USA). RPMI1640 and phosphate-buffered saline were purchased from Nacalai Tesque (Kyoto, Japan) and Cosmo Bio (Tokyo, Japan), respectively. PPAR $\alpha$  antagonist, MK886, and PPAR $\gamma$  antagonists, GW9662 and T0070907, were purchased from Cayman Chemical (Ann Arbor, MI, USA). The human THP-1 cells used were purchased from the American Type Culture Collection (ATCC) and maintained in RPMI 1640 medium supplemented with 10% FBS and 1% P/S at 37°C in a 5% CO<sub>2</sub> humidified atmosphere.

Human monocytic THP-1 cells with a density of  $1 \times 10^6$  cells/well in 6-well plates were incubated with 10 or 50  $\mu$ M EPA for 24 h, stimulated with 20 ng/ml lipopolysaccharide (LPS) for 6 h, and then harvested. In experiments using PPAR antagonists, THP-1 monocytes were incubated in RPMI1640 containing 0.5% FBS, 1% P/S, and 5 mg/ml BSA for 24 h and then preincubated with 10  $\mu$ M PPAR antagonists (MK886, GW9662, or T0070907) 1 h before EPA treatment. Thereafter, 50  $\mu$ M EPA was added to cells and incubated for 24 h, and then cells were stimulated with LPS for 6 h and harvested. Total RNA was extracted from the cultured cells using TRIzol reagent (Invitrogen, Carlsbad, CA, USA). The expression of IL-10 was analyzed with a real-time quantitative PCR method using the above-mentioned primers (2). The IL-10 levels in the culture supernatant were determined employing the above-mentioned ELISA kit (R&D Systems, Minneapolis, MN, USA) (5).

## PPAR $\alpha$ and PPAR $\gamma$ silencing by small interfering RNA

Human PPAR $\alpha$ - and PPAR $\gamma$ -specific small interfering RNA (siRNA) and scrambled control siRNA oligonucleotides (FlexiTube siRNA Premix Ctrl\_Control\_1, Hs\_PPARG\_5, Hs\_PPARG\_6, Hs\_PPARG\_1, Hs\_PPARG\_2) were purchased from QIAGEN (Valencia, CA, USA). In this analysis, THP-1 cells were differentiated into adherent, well-spread macrophages by the addition of 100 nM phorbol myristate acetate. THP-1 cells were re-plated in 12-well plates at a density of  $2 \times 10^5$  cells/well in RPMI1640 containing 10% FBS and 1% P/S. The medium was changed to OPTI-MEM I (GIBCO, Great Island, NY, USA), and each siRNA premix was added at 25 nM. The cells were incubated for 48 h, the medium was changed again to RPMI1640 containing 0.5% FBS, 1% P/S, and 5 mg/ml BSA, and then 50  $\mu$ M EPA was added and incubated for 24 h. The cells were stimulated with LPS for 6 h, and then harvested.

## SUPPLEMENTARY DATA

### Transient transfection and luciferase assay

The luciferase reporter assay was performed as previously described (6), using the luciferase reporter constructs for the human IL-10 promoter (7). Fragments of the human IL-10 promoter were cloned from THP-1 genomic DNA by PCR using the following primers: -384F 5'-GGG GTA CCG AAT GAG AAC CCA CAG CTG-3', -421F 5'- GGG GTA CCG GCA ATT TGT CCA CGT CAC-3' and 120R 5'-CCG CTC GAG GGC AGG TTG CCT GGG AAG-3', yielding two fragments spanning from -384 to +120 and -421 to +120 of the IL-10 promoter sequence. Fragments were subcloned into the pGL3-Basic (Promega) vector to produce pGL3-P384 and pGL3-P421, and the sequences were checked. pGL3-P421, not pGL3-P384, contained the (-406/-390) IL-10-peroxisome proliferator response element (PPRE).

THP-1 monocytes were transiently transfected using FuGENE6 (Promega, Madison, WI, USA) with either pGL3-P384 or pGL3-P421 and a control plasmid pRL-TK (Promega). After 24 h, cells were treated with 50  $\mu$ M EPA for 24 h, and then stimulated by LPS for 6 h. Luciferase activity was measured using the Dual-Luciferase<sup>®</sup> Reporter Assay System (Promega) with a luminometer, and the results were normalized against the *Renilla* luciferase control. Student's *t*-test was performed to determine significant values for treatments compared with the vehicle controls.

### Chromatin immunoprecipitation assay

Chromatin immunoprecipitation (ChIP) assays were performed as described by Suganami T et al (8). using an anti-PPAR $\gamma$  antibody (sc-7196, Santa Cruz Biotechnologies). THP-1 cells were treated with 50  $\mu$ M EPA for 24 h, and stimulated by LPS (20 ng/ml) for 6 h. Protein-DNA complexes were cross-linked in 1% formaldehyde for 10 min at room temperature. Cross-linking was stopped by the addition of 1 M glycine for 10 min at 4°C. Cells were lysed and sonicated to shear DNA into 0.1-1.0-kb fragments and cellular debris was removed by centrifugation. Chromatin aliquots were pre-cleared with 80  $\mu$ l of 50% protein A sepharose suspension. The immune-complexes were precipitated with either an antibody against PPAR $\gamma$  or normal rabbit IgG (sc-2027, Santa Cruz Biotechnologies) overnight at 4°C with rotation. Before immunoprecipitation, "input" samples were removed from the lysates. The immunocomplexes were mixed with protein A sepharose suspension followed by incubation for 1 h at 4°C with rotation. Beads were collected by brief centrifugation and the immunocomplexes were eluted by elution buffer (1% SDS, 0.1 M NaHCO<sub>3</sub>, 10 mM DTT). Precipitated complexes were reverse cross-linked with 0.2 mM NaCl overnight at 65°C. DNA fragments were purified with the QIAquick Spin kit (Qiagen, Hilden, Germany), and the purified DNA was used for quantitative real-time PCR employing the following primers, converting the -462 to -323 region of the human IL-10 promoter containing the (-406/-390) IL-10-PPRE: sense primer 5'-GGG GGA CCC AAT TAT TTC TC-3' and anti-sense primer 5'-TGA TTT CCT GGG GAG AAC AG-3'; or part of the GAPDH gene: sense primer 5'- TGC ACC ACC AAC TGC TTA GC-3' and anti-sense primer 5'- GGA TGC AGG GAT GAT GTT CTG-3' as a negative control. ChIP experiments were run in triplicate.

**Supplementary Table 1.** Baseline characteristics of obese patients with or without dyslipidemia

|                                                     | Obese patients without dyslipidemia |          |             | Obese patients with dyslipidemia |          |             | P-value*         |
|-----------------------------------------------------|-------------------------------------|----------|-------------|----------------------------------|----------|-------------|------------------|
| <b>n (Male/Female)</b>                              | <b>11/15</b>                        |          |             | <b>53/37</b>                     |          |             |                  |
| <b>Age (years)</b>                                  | <b>50.1</b>                         | <b>±</b> | <b>10.3</b> | <b>51.2</b>                      | <b>±</b> | <b>12.8</b> | <b>0.688</b>     |
| <b>BMI (kg/m<sup>2</sup>)</b>                       | <b>31.2</b>                         | <b>±</b> | <b>5.6</b>  | <b>30.9</b>                      | <b>±</b> | <b>4.8</b>  | <b>0.781</b>     |
| <b>Systolic blood pressure (mmHg)</b>               | <b>147</b>                          | <b>±</b> | <b>19</b>   | <b>141</b>                       | <b>±</b> | <b>19</b>   | <b>0.149</b>     |
| <b>Diastolic blood pressure (mmHg)</b>              | <b>87.6</b>                         | <b>±</b> | <b>12.8</b> | <b>85.5</b>                      | <b>±</b> | <b>11.1</b> | <b>0.402</b>     |
| <b>EPA (µg/ml) <sup>a</sup></b>                     | <b>66 [ 38 - 113 ]</b>              |          |             | <b>53 [ 35 - 97 ]</b>            |          |             | <b>0.629</b>     |
| <b>EPA/Arachidonic acid <sup>a</sup></b>            | <b>0.5 [ 0.3 - 0.8 ]</b>            |          |             | <b>0.3 [ 0.2 - 0.6 ]</b>         |          |             | <b>0.188</b>     |
| <b>Fasting plasma glucose (mmol/l) <sup>a</sup></b> | <b>6.9 [ 5.4 - 8.3 ]</b>            |          |             | <b>5.9 [ 5.1 - 8.0 ]</b>         |          |             | <b>0.121</b>     |
| <b>HbA1c (%)<sup>a</sup></b>                        | <b>7.0 [ 5.7 - 8.0 ]</b>            |          |             | <b>6.2 [ 5.6 - 7.4 ]</b>         |          |             | <b>0.318</b>     |
| <b>IRI (pmol/l) <sup>a</sup></b>                    | <b>62 [ 39 - 106 ]</b>              |          |             | <b>73 [ 49 - 127 ]</b>           |          |             | <b>0.117</b>     |
| <b>Triglycerides (mmol/l) <sup>a</sup></b>          | <b>1.2 [ 0.9 - 1.3 ]</b>            |          |             | <b>2.2 [ 1.8 - 2.9 ]</b>         |          |             | <b>&lt;0.001</b> |
| <b>HDL-C (mmol/l)</b>                               | <b>1.6</b>                          | <b>±</b> | <b>0.2</b>  | <b>1.4</b>                       | <b>±</b> | <b>0.3</b>  | <b>&lt;0.001</b> |
| <b>LDL-C (mmol/l)</b>                               | <b>3.1</b>                          | <b>±</b> | <b>0.7</b>  | <b>3.4</b>                       | <b>±</b> | <b>0.7</b>  | <b>0.060</b>     |
| <b>Adiponectin (µg/ml) <sup>a</sup></b>             | <b>8.2 [ 5.6 - 12.1 ]</b>           |          |             | <b>6.0 [ 4.2 - 7.7 ]</b>         |          |             | <b>0.010</b>     |
| <b>CRP (µg/ml) <sup>a</sup></b>                     | <b>0.96 [ 0.42 - 1.85 ]</b>         |          |             | <b>0.73 [ 0.46 - 2.06 ]</b>      |          |             | <b>0.870</b>     |
| <b>IL-10 (pg/ml)</b>                                | <b>5.62</b>                         | <b>±</b> | <b>1.59</b> | <b>4.82</b>                      | <b>±</b> | <b>1.27</b> | <b>0.047</b>     |
| <b>PWV (cm/sec)</b>                                 | <b>1375</b>                         | <b>±</b> | <b>224</b>  | <b>1416</b>                      | <b>±</b> | <b>311</b>  | <b>0.555</b>     |
| <b>Expression in monocytes</b>                      |                                     |          |             |                                  |          |             |                  |
| <b>TNFα(arbitrary units) <sup>a</sup></b>           | <b>3.1 [ 2.5 - 3.7 ]</b>            |          |             | <b>2.7 [ 1.6 - 4.1 ]</b>         |          |             | <b>0.349</b>     |
| <b>IL-6 (arbitrary units) <sup>a</sup></b>          | <b>7.3 [ 5.2 - 11.0 ]</b>           |          |             | <b>8.0 [ 5.8 - 10.1 ]</b>        |          |             | <b>0.634</b>     |
| <b>IL-10 (arbitrary units) <sup>a</sup></b>         | <b>6.6 [ 3.8 - 10.2 ]</b>           |          |             | <b>4.4 [ 2.9 - 7.5 ]</b>         |          |             | <b>0.030</b>     |
| <b>CD163/CD14 (%)</b>                               | <b>59.0</b>                         | <b>±</b> | <b>12.1</b> | <b>55.3</b>                      | <b>±</b> | <b>13.1</b> | <b>0.169</b>     |
| <b>Proportion of</b>                                |                                     |          |             |                                  |          |             |                  |
| <b>Diabetes (%)</b>                                 | <b>57.7</b>                         |          |             | <b>44.4</b>                      |          |             | <b>0.233</b>     |
| <b>Hypertension (%)</b>                             | <b>61.5</b>                         |          |             | <b>51.7</b>                      |          |             | <b>0.658</b>     |

BMI, body mass index; EPA, eicosapentaenoic acid; IRI, immunoreactive insulin; HDL-C, high-density-lipoprotein cholesterol; LDL-C, low-density-lipoprotein cholesterol; CRP, high-sensitive C-reactive protein; PWV, pulse wave velocity. Data are shown as the mean ± S.D. or median and interquartile range, as appropriate. \*Student's *t*-test, the non-parametric Wilcoxon test and Chi-square test were used to compare mean, median and proportion, respectively, in obese patients without dyslipidemia vs. obese patients with dyslipidemia groups. <sup>a</sup> Data were non-normally distributed and analyzed by non-parametric Wilcoxon test.

SUPPLEMENTARY DATA

**Supplementary Table 2.** Baseline correlations related to the expression of TNF $\alpha$ , IL-6, IL-10, and CD163/CD14 in peripheral blood monocytes and PWV

|                            | Expression in monocytes   |                   |                    |                     | PWV                 |
|----------------------------|---------------------------|-------------------|--------------------|---------------------|---------------------|
|                            | TNF $\alpha$ <sup>a</sup> | IL-6 <sup>a</sup> | IL-10 <sup>a</sup> | CD163/CD14          |                     |
|                            | <i>r</i>                  | <i>r</i>          | <i>r</i>           | <i>r</i>            | <i>r</i>            |
| Age                        | 0.30 <sup>**</sup>        | -0.07             | -0.09              | 0.05                | 0.57 <sup>**</sup>  |
| BMI                        | 0.01                      | 0.08              | -0.05              | -0.22 <sup>*</sup>  | -0.19 <sup>*</sup>  |
| Systolic blood pressure    | -0.01                     | -0.12             | -0.02              | -0.17               | 0.42 <sup>**</sup>  |
| EPA <sup>a</sup>           | 0.23 <sup>*</sup>         | -0.11             | 0.03               | 0.04                | 0.09                |
| HbA1c <sup>a</sup>         | 0.02                      | 0.03              | -0.21 <sup>*</sup> | -0.24 <sup>**</sup> | -0.02               |
| Triglycerides <sup>a</sup> | 0.04                      | 0.02              | -0.16              | -0.18               | 0.04                |
| HDL-C                      | 0.12                      | -0.06             | -0.01              | 0.02                | 0.13                |
| Adiponectin <sup>a</sup>   | 0.28 <sup>**</sup>        | -0.08             | 0.02               | 0.13                | -0.10               |
| IL-10                      | -0.04                     | 0.09              | 0.07               | 0.03                | 0.17                |
| PWV                        | 0.08                      | -0.02             | -0.19 <sup>*</sup> | -0.26 <sup>**</sup> | -                   |
| Expression in monocytes    |                           |                   |                    |                     |                     |
| TNF $\alpha$ <sup>a</sup>  | -                         | 0.17              | -0.10              | -0.18 <sup>*</sup>  | 0.08                |
| IL-6 <sup>a</sup>          | 0.17                      | -                 | -0.04              | -0.09               | -0.02               |
| IL-10 <sup>a</sup>         | -0.10                     | -0.04             | -                  | 0.11                | -0.19 <sup>*</sup>  |
| CD163/CD14                 | -0.18 <sup>*</sup>        | -0.09             | 0.11               | -                   | -0.26 <sup>**</sup> |

In 116 obese patients, correlations related to changes in monocyte IL-10 and PWV at the baseline were examined. The abbreviations used in this table are the same as those in Table 1. *r*, correlation coefficient. \*  $P < 0.05$ , \*\*  $P < 0.01$ . Data are Pearson's correlation coefficient of the expression of cytokines in monocytes and PWV with all variables at the baseline. <sup>a</sup> Logarithmic transformation was performed since the variable had a skewed distribution.  $n = 116$  obese patients.

## SUPPLEMENTARY DATA

**Supplementary Figure 1.** Study Design and Enrollment Flowchart shows the numbers of patients who were enrolled in the study, underwent randomization, and completed the study.

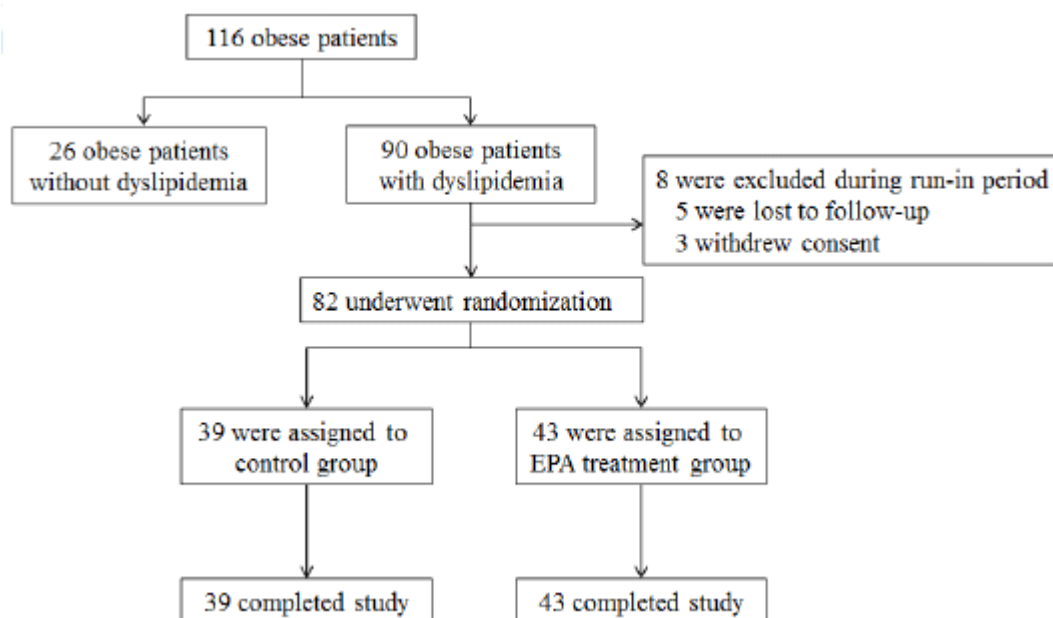

**Supplementary Figure 2.** Correlations related to changes in IL-10 in peripheral blood and PWV during treatment with EPA. Correlations between  $\Delta$ IL-10 and  $\Delta$ EPA (A),  $\Delta$ IL-10 and  $\Delta$ adiponectin (B),  $\Delta$ PWV and  $\Delta$ IL-10 (C), and  $\Delta$ PWV and  $\Delta$ adiponectin (D).

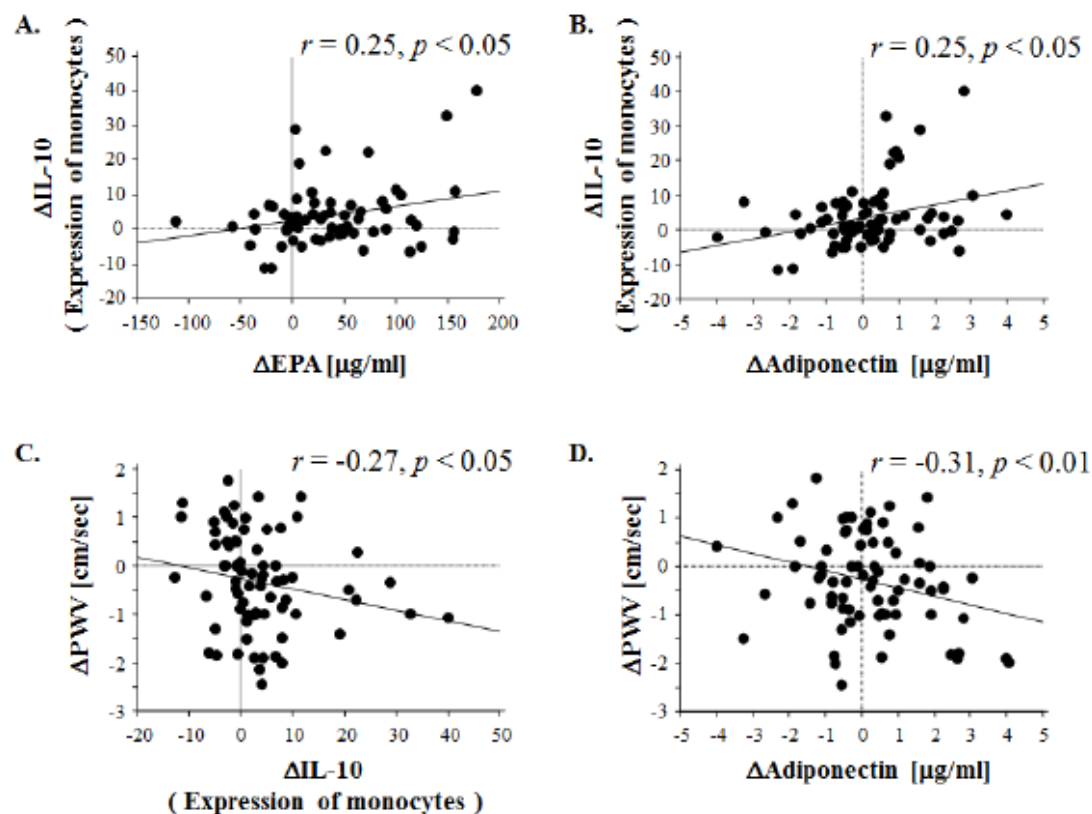

## Results

Baseline correlations among metabolic syndrome-related variables, M1/M2 markers in peripheral blood monocytes, and PWV

In all subjects, Pearson's correlation coefficient showed that  $\ln$  TNF $\alpha$  mRNA levels in peripheral blood monocytes were positively correlated with age and  $\ln$  adiponectin expression ( $P < 0.01$ ), and  $\ln$  EPA and  $\ln$  EPA/AA ( $P < 0.05$ ), and negatively correlated with CD163 in monocytes ( $P < 0.05$ ). In this study, the  $\ln$  IL-6 mRNA level in monocytes was not correlated with any variable. However, the  $\ln$  IL-10 mRNA level in monocytes was negatively correlated with  $\ln$  FPG,  $\ln$  HbA1c, and PWV ( $P < 0.05$ ). CD163 expression in monocytes was negatively correlated with BMI, ( $P < 0.05$ ),  $\ln$  HbA1c,  $\ln$  IRI, PWV ( $P < 0.01$ ), and the  $\ln$  TNF $\alpha$  mRNA level in monocytes ( $P < 0.05$ ). PWV showed positive correlations with age and SBP ( $P < 0.01$ ) and negative correlations with BMI and  $\ln$  IL-10 expression in monocytes ( $P < 0.05$ ), and CD163 expression in monocytes ( $P < 0.01$ ) (Supplemental Table II).

## References

1. Ghanim H, Aljada A, Hofmeyer D, Syed T, Mohanty P, Dandona P. Circulating mononuclear cells in the obese are in a proinflammatory state. *Circulation* 2004;110:1564-1571.
2. Satoh N, Shimatsu A, Himeno A, Sasaki Y, Yamakage H, Yamada K, Suganami T, Ogawa Y. Unbalanced M1/M2 phenotype of peripheral blood monocytes in obese diabetic patients: effect of pioglitazone. *Diabetes Care* 2010;33:e7.
3. Itoh M, Suganami T, Satoh N, Tanimoto-Koyama K, Yuan X, Tanaka M, Kawano H, Yano T, Aoe S, Takeya M, Shimatsu A, Kuzuya H, Kamei Y, Ogawa Y. Increased adiponectin secretion by highly purified eicosapentaenoic acid in rodent models of obesity and human obese subjects. *Arterioscler Thromb Vasc Biol* 2007; 27:1918-1925.
4. Yamada H, Yoshida M, Nakano Y, Suganami T, Satoh N, Mita T, Azuma K, Itoh M, Yamamoto Y, Kamei Y, Horie M, Watada H, Ogawa Y. *In vivo* and *In vitro* Inhibition of Monocyte Adhesion to Endothelial Cells and Endothelial Adhesion Molecules by Eicosapentaenoic Acid. *Arterioscler Thromb Vasc Biol* 2008;28:2173-2179.
5. Manigrasso MR, Ferroni P, Santilli F, et al. Manigrasso MR, Ferroni P, Santilli F, Taraborelli T, Guagnano MT, Michetti N, Davì G. Association between circulating adiponectin and interleukin-10 levels in android obesity: effects of weight loss. *J Clin Endocrinol Metab* 2005;90:5876-5879.
6. Suganami T, Tanimoto-Koyama K, Nishida J, Itoh M, Yuan X, Mizuarai S, Kotani H, Yamaoka S, Miyake K, Aoe S, Kamei Y, Ogawa Y. Role of the Toll-like receptor 4/NF-kappaB pathway in saturated fatty acid-induced inflammatory changes in the interaction between adipocytes and macrophages. *Arterioscler Thromb Vasc Biol* 2007;27:84-91.
7. Thompson PW, Bayliffe AI, Warren AP, Lamb JR. Interleukin-10 is upregulated by nanomolar rosiglitazone treatment of mature dendritic cells and human CD4+ T cells. *Cytokine* 2007;39:184-191.
8. Suganami T, Yuan X, Shimoda Y, Uchio-Yamada K, Nakagawa N, Shirakawa I, Usami T, Tsukahara T, Nakayama K, Miyamoto Y, Yasuda K, Matsuda J, Kamei Y, Kitajima S, Ogawa Y. Activating transcription factor 3 constitutes a negative feedback mechanism that attenuates saturated Fatty acid/toll-like receptor 4 signaling and macrophage activation in obese adipose tissue. *Circ Res* 2009;105:25- 32.
